# Supplementary material
Source: PubMed Central journal article supplement (PMC4041664)
Supplement: es500567w_si_001.pdf [file es500567w_si_001.pdf]

1 **Supporting Information**

2 **Fate and Uptake of Pharmaceuticals in Soil-**  
3 **Earthworm Systems**

4

5 Laura J. Carter<sup>1</sup>, Catherine D. Garman<sup>1</sup>, James Ryan<sup>2</sup>, Adam Dowle<sup>3</sup>, Ed Bergström<sup>4</sup>, Jane Thomas-  
6 Oates<sup>4</sup>, Alistair B.A. Boxall<sup>1\*</sup>

7 1 – Environment Department, University of York, Heslington, York, UK, YO10 5DD

8 2 – EHS Technical CoE, GlaxoSmithKline, Ware, UK, SG12 0DP

9 3 – Department of Biology, Bioscience Technology Facility and Centre of Excellence in Mass  
10 Spectrometry, University of York, York, UK YO10 5DD

11 4 – Department of Chemistry, and Centre of Excellence in Mass Spectrometry, University of York,  
12 York, UK YO10 5DD

13

14

15

16 Number of tables: 5

17 Number of figures: 2

18 Additional text: Sorption of study compounds to soil, *E. fetida* toxicity experiment,  
19 preparation of samples for analysis and detailed methods of metabolism study.

20

21

22 **Table SI 1:** Test soil characteristics († Analysis completed at The French National Institute  
 23 for Agricultural Research (INRA) (Arras, France) \*Analysis completed onsite at The Food  
 24 and Environment Research Agency (FERA) (York, U.K.)).

|                                                      |      |
|------------------------------------------------------|------|
| Fine sand (50/200 $\mu\text{m}$ ) (g/kg) †           | 272  |
| Coarse sand (200/2000 $\mu\text{m}$ ) (g/kg) †       | 136  |
| Fine silt (2/20 $\mu\text{m}$ ) (g/kg) †             | 197  |
| Coarse silt (20/50 $\mu\text{m}$ ) (g/kg) †          | 164  |
| Clay (< 2 $\mu\text{m}$ ) (g/kg) †                   | 231  |
| pH (water) †*                                        | 6.31 |
| Cation exchange capacity $\text{cmol}^+/\text{kg}$ † | 10.3 |
| Organic carbon (%) †                                 | 1.89 |
| C/N †                                                | 11.2 |
| Organic matter (%) †                                 | 3.27 |
| Water holding capacity (%w/w) *                      | 17.3 |

25

26

27

28 **Table SI 2:** LC-MS/MS parameters used for the analysis of the compounds

| <b>Compound</b>                   | <b>Parent ion<br/>(<math>m/z</math>)</b> | <b>MRM<br/>product<br/>ion (<math>m/z</math>)</b> | <b>'Collision<br/>energy'<br/>setting</b> | <b>Collision<br/>cell exit<br/>potential<br/>setting</b> | <b>Retention<br/>time (min)</b> |
|-----------------------------------|------------------------------------------|---------------------------------------------------|-------------------------------------------|----------------------------------------------------------|---------------------------------|
| Carbamazepine                     | 237.3<br>( $\text{M}+\text{H}^+$ )       | 194.3                                             | 13                                        | 15                                                       | 1.8                             |
| Carbamazepine-<br>D <sub>10</sub> | 247.5<br>( $\text{M}+\text{H}^+$ )       | 204.2                                             | 13                                        | 15                                                       | 1.8                             |
| Fluoxetine                        | 310.3<br>( $\text{M}+\text{H}^+$ )       | 148.3                                             | 25                                        | 12                                                       | 1.6 – 1.9                       |
| Fluoxetine-D <sub>5</sub>         | 315.2<br>( $\text{M}+\text{H}^+$ )       | 153.2                                             | 25                                        | 12                                                       | 1.6 – 1.9                       |
| Diclofenac                        | 296.2 ( $\text{M}-\text{H}^+$ )          | 250.0                                             | 15                                        | 11                                                       | 4.1                             |
| Diclofenac-D <sub>4</sub>         | 298 ( $\text{M}-\text{H}^+$ )            | 254.1                                             | 15                                        | 11                                                       | 4.1                             |

29 **Table SI 3:** Analyte detection in earthworm samples from LC-MS/MS analysis. BSAF is the  
30 biota-soil accumulation factor.

| <b>Compound</b> | <b>Soil spike<br/>(mg/kg)</b> | <b>BSAF</b> | <b>Expected<br/>(ng/g)</b> | <b>Average<br/>measured<br/>(ng/g) (<math>\pm</math><br/>standard<br/>deviation)</b> |
|-----------------|-------------------------------|-------------|----------------------------|--------------------------------------------------------------------------------------|
| Carbamazepine   | 0.8                           | 0.3         | 260                        | 491.2 ( $\pm$ 18.5)                                                                  |
| Diclofenac      | 0.8                           | 0.6         | 456                        | < LOQ                                                                                |
| Fluoxetine      | 1.6                           | 0.3         | 466                        | 803.0 ( $\pm$ 97.8)                                                                  |

31

32 The BSAF was estimated by dividing the maximum earthworm tissue concentration by the  
33 measured soil concentration in the radiolabelled studies. By dividing the BSAF by the  
34 nominal soil concentration in the un-labelled experiments we therefore calculated an  
35 expected earthworm tissue concentration which would allow for comparison to the measured  
36 earthworm concentration in the unlabelled experiments.

37 **Table SI 4:** FOCUS modelling results from dissipation of pharmaceuticals in soil

| Pharmaceutical | Kinetics              | Chi ( $\chi^2$ )<br>(Tabulated<br>$\chi^2$ ) | DT <sub>50</sub> (d) | DT90 (d) |
|----------------|-----------------------|----------------------------------------------|----------------------|----------|
| Carbamazepine  | Single First<br>order | 2.0 (12.6)                                   | 68                   | 226      |
| Diclofenac     | N/A                   | N/A                                          | N/A                  | N/A      |
| Fluoxetine     | Single First<br>order | 5.1 (12.6)                                   | 66                   | 220      |
| Orlistat       | Single First<br>order | 6.4 (12.6)                                   | 48                   | 159      |

38

39

40 **Table SI 5:** Known diclofenac metabolites and transformation products detected in various  
 41 matrices for comparison against data obtained in this study using LC-FTMS analysis

| <b>Diclofenac metabolites / transformation products</b>           | <b>Matrice</b>                      | <b>Reference</b>                                                                            |
|-------------------------------------------------------------------|-------------------------------------|---------------------------------------------------------------------------------------------|
| acyl glucuronide of diclofenac                                    | Fish bile                           | Kallio et al., 2010                                                                         |
| acyl glucuronide of 3'-hydroxydiclofenac                          | Fish bile                           | Kallio et al., 2010                                                                         |
| acyl glucuronide of 4'-hydroxydiclofenac                          | Fish bile                           | Kallio et al., 2010                                                                         |
| acyl glucuronide of 5-hydroxydiclofenac                           | Fish bile                           | Kallio et al., 2010                                                                         |
| ether glucuronide of 4'-hydroxydiclofenac                         | Fish bile                           | Kallio et al., 2010                                                                         |
| sulfate conjugate of 4'-hydroxydiclofenac                         | Fish bile                           | Kallio et al., 2010                                                                         |
| sulfate conjugate of 5-hydroxydiclofenac                          | Fish bile                           | Kallio et al., 2010                                                                         |
| sulfate conjugate of 4',5-dihydroxydiclofenac                     | Fish bile                           | Kallio et al., 2010                                                                         |
| monosulfate conjugate of dihydroxydiclofenac                      | Fish bile                           | Kallio et al., 2010                                                                         |
| acyl-migrated isomers of acyl glucuronide of 3'-hydroxydiclofenac | Fish bile                           | Kallio et al., 2010                                                                         |
| acyl-migrated isomers of acyl glucuronide of diclofenac           | Fish bile                           | Kallio et al., 2010                                                                         |
| 5-hydroxydiclofenac                                               | Fish bile/ Sewage effluent          | Scheurell et al., 2009<br>Stülten et al., 2008<br>Kallio et al., 2010                       |
| 8-Chlorocarbazole-1-yl-ethanoic acid                              | Effluent                            | Scheurell et al., 2009                                                                      |
| 3'-Hydroxydiclofenac                                              | Effluent                            | Scheurell et al., 2009                                                                      |
| 1-(2,6-Dichlorophenyl)-1,3-dihydro-2 <i>H</i> -indole-2-one       | Effluent                            | Scheurell et al., 2009                                                                      |
| 1- $\beta$ - <i>O</i> -acyl glucuronide of diclofenac             | Rat liver                           | Lee et al., 2012                                                                            |
| 4'-hydroxydiclofenac                                              | Fish bile/effluent/rat liver/plants | Kallio et al., 2010<br>Scheurell et al., 2009<br>Huber et al., 2012<br>Stülten et al., 2008 |

42

43

44 **Figure SI 1:** Measured soil concentration data from uptake phase for carbamazepine (A),  
45 fluoxetine (B) and orlistat (C) fitted with a single first order model. Diclofenac could not be  
46 modelled.

47 A)

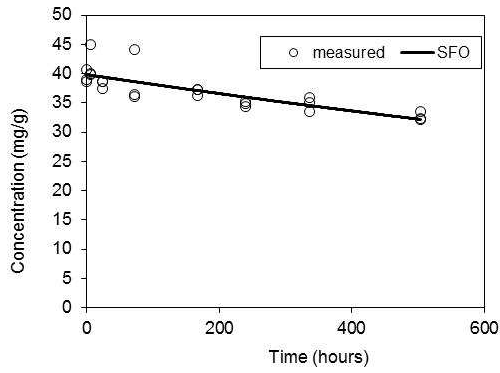

48

B)

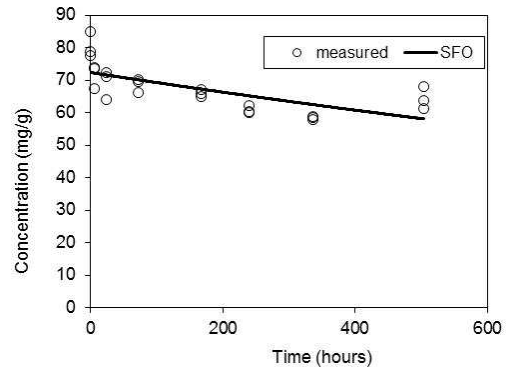

49 C)

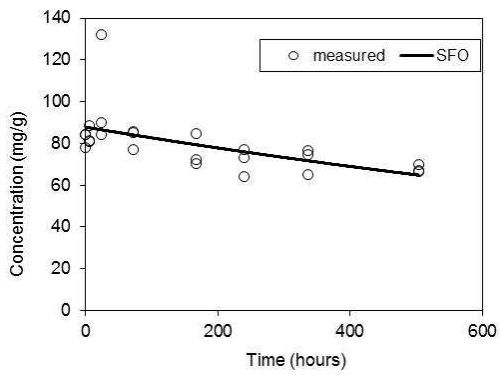

50

51

52 **Figure SI 2:** Comparison between measured pore water concentrations obtained from the  
 53 uptake and depuration experiment and estimated pore water concentrations (PEC<sub>pw</sub>) for each  
 54 pharmaceutical for A) carbamazepine, B) diclofenac, C) fluoxetine, D) orlistat. The closed  
 55 and open diamonds represent measured concentrations and estimated concentrations  
 56 respectfully.

57 The predicted environmental concentration in pore water (PEC<sub>pw</sub>) (Technical Guidance  
 58 Document (TGD) on Risk Assessment Part II, 2003) was calculated based on measured soil  
 59 data using the following equation:  $PEC_{pw} = (C_{soil} * RHO_{soil}) / (K_d * 1000)$

60 Where C<sub>soil</sub> is the measured concentration in the soil (this can be predicted soil concentration  
 61 (PEC<sub>soil</sub>) if measured data are unavailable – see TGD for equation), RHO<sub>soil</sub> is bulk density of  
 62 the soil (kg m<sup>-3</sup>) K<sub>d</sub> is the soil sorption distribution coefficient for each pharmaceutical in the  
 63 test soil.

A)

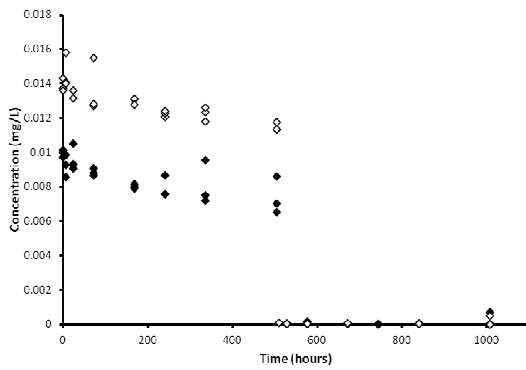

B)

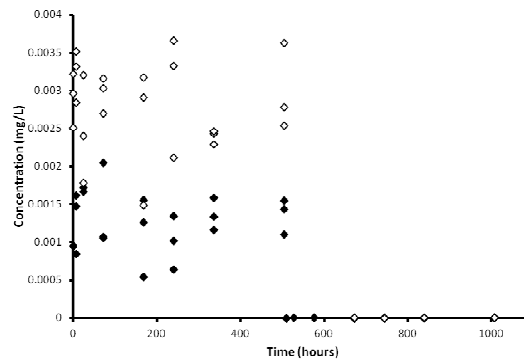

C)

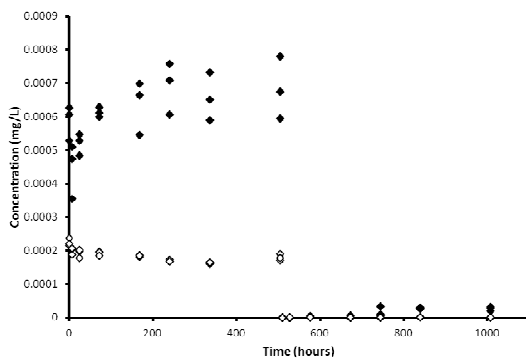

D)

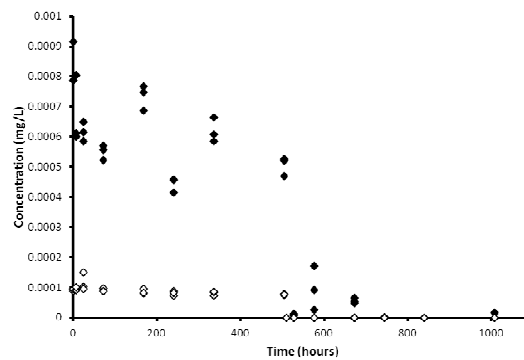

64 **Sorption of study compounds to test soil.**

65 The sorption behaviour of the study APIs in the test soil was assessed using a batch  
66 equilibrium method based on OECD guideline 106. Study pharmaceuticals were applied to a  
67 mixture of soil and a 0.1 M CaCl<sub>2</sub> solution contained in PTFE centrifuge tubes in triplicate.  
68 The soil solution ratios, selected based on preliminary investigations, were 1:5, 1:20, 1:30  
69 and 1:30 for diclofenac, carbamazepine, fluoxetine and orlistat respectively. The resulting  
70 soil/solution mixtures were shaken in the dark (250 oscillations/min) at a temperature of 4 °C  
71 on a side-to-side shaker for 48 h, as preliminary studies showed that this was sufficient time  
72 for the test APIs to reach equilibrium between the soil and liquid phase. The samples were  
73 then removed and centrifuged at 3500 rpm for 10 minutes using a Heremle Z 513K Bench  
74 Top Centrifuge. A 1 mL aliquot of supernatant was then taken and mixed with 10 mL of  
75 Ecoscint A scintillation cocktail (National Diagnostics, Atlanta, Georgia) and the levels of  
76 radiation remaining in solution was determined by liquid scintillation counting (LSC) using a  
77 Beckman LS 6500 (Beckman Coulter Inc., Fullerton, USA). Soil sorption coefficients ( $K_d$ )  
78 values were then determined based on the amount of pharmaceutical applied and the amount  
79 remaining in the supernatant at equilibrium (Table 2).

80



81 **Toxicity of study compounds to *Eisenia fetida*.**

82 ***Methods:***

83 Toxicity experiments were performed to ensure that the test concentrations used in the uptake  
84 studies were not toxic to the *E. fetida*. Earthworms were exposed in replicates of six to soil  
85 containing ten times and a hundred times the proposed test concentration for the main uptake  
86 study. The test vessel consisted of a 120 mL glass jar to which  $50 \pm 1$  g of soil (dry weight)  
87 was added. One earthworm per vessel was added and beakers were incubated under similar  
88 conditions to the main experiment for the period of the exposure. Burrowing behaviour,  
89 potential weight change and mortality were compared to that observed in solvent controls and  
90 blank controls, to see if the pharmaceuticals had measurable effects on these variables.

91 ***Results and Discussion:***

92 No mortality was observed in any of the toxicity experiments. There were no significant  
93 differences in the burrowing times of *E. fetida* after exposure to each of the pharmaceutical  
94 compounds (x 10 and x 100) in comparison to the blank and solvent controls ( $F < 0.709$ , d.f. =  
95 3,  $p > 0.05$ ), with more than 90 % of earthworms burrowing beneath the soil within 10  
96 minutes of being placed on the soil surface. Over the test period, the masses of *E. fetida*  
97 increased; however there was no significant difference in the growth rate of *E. fetida* exposed  
98 to pharmaceutical treated soils or to control soils (for carbamazepine and fluoxetine  
99 [ $F < 2.323$ , d.f. = 3,  $p > 0.05$ ]) (for diclofenac and orlistat [ $H < 4.610$ , d.f. = 3,  $p > 0.05$ ]). No  
100 unusual earthworm behaviour (e.g. coming to the soil surface, stiffening) or physiological  
101 differences (e.g. surface lesions) was noted for any of pharmaceutical-exposed worms. It was  
102 therefore concluded that as no visible effect on the earthworm behaviour was seen at 10 x and

103 100 x the proposed test concentrations for the main uptake and depuration experiments,  
104 uptake and depuration would unlikely be affected by pharmaceutical toxic effects.

105 In terms of pharmaceutical toxicity to earthworms, there is relatively little research. Previous  
106 studies have observed no *E. fetida* mortality after exposure to tetracyclines at  
107 environmentally relevant concentrations (Qu et al., 2005), similar to the results from this  
108 study. However, exposure to chlorotetracycline and tetracycline has induced changes in  
109 biochemical markers, including serious DNA damage to coelomocytes and enzyme activities  
110 in earthworms (Dong et al., 2012). As pharmaceutical toxicity was not evaluated on a  
111 biochemical scale in this study, further research is needed to establish if similar effects are  
112 observed with human pharmaceuticals comparable to what has been observed with  
113 tetracyclines.

114

115 **Preparation of soil, pore water and earthworm samples for analysis.**

116 To extract pore water, soil ( $25 \pm 2$  g) was placed in a disposable syringe with a layer of 3 cm  
117 of glass wool inserted into the bottom. The syringe was centrifuged for 40 minutes (2 x 20  
118 minute runs) at 3000 RPM after which the pore water was collected from the bottom of the  
119 tube and transferred to a 2 mL plastic microfuge tube. The microfuge tubes containing the  
120 sampled pore water were then further centrifuged at 12000 RCF for 4 min to sediment loose  
121 particles. A 500  $\mu$ L sample of pore water was then added to 10 mL of EcoScint A  
122 scintillation cocktail for analysis.

123 Soil samples were extracted by liquid extraction. For the carbamazepine study,  $5 \pm 0.5$  g of  
124 soil was extracted twice for 45 min on a side to side shaker ( $250 \text{ oscillations min}^{-1}$ ) with 2 x  
125 10 mL of methanol. A similar method was used in the fluoxetine and orlistat studies except  
126 that for fluoxetine a mixture of acetonitrile and water (7:3 v/v) was used as the solvent and  
127 for orlistat, acetonitrile was used. For the diclofenac study, 10 g samples of soil were  
128 extracted three times for 45 min each time with 20 mL ethyl acetate. Samples (1 mL) of  
129 extracts were then added to 10 mL of EcoScint A for analysis of the radioactivity present.

130 Even with the high extraction recoveries for diclofenac, after solvent extraction, the  
131 concentration at the start of the experiment was significantly lower than expected. A large  
132 amount of dissipation of radioactivity from the orlistat test beakers was also observed, which  
133 unlike the other test compounds, could not be explained by uptake into *E. fetida*. It was  
134 theorised that due to orlistat's particularly hydrophobic nature and high  $K_d$  value it would  
135 have a strong sorption capacity to the soil, to such an extent that a fraction of the compound  
136 may have become irreversibly bound to the soil. Combustion analysis of the diclofenac and  
137 orlistat soils was therefore performed to determine if there was radioactivity remaining in the  
138 soil which may account for the discrepancies. Combustion analysis was performed on a

139 Perkin Elmer 307 Sample Oxidiser. After solvent extraction to determine the total extractable  
140 residues, the dried soils were homogenised into a fine powder. Each soil sample was prepared  
141 in triplicate in combusto-cones in which  $300 \pm 25$  mg of soil was mixed with equal amounts  
142 of cellulose powder. After combustion consisting of a 1.5 min burn per sample, the  $^{14}\text{C}$   
143 carbon dioxide was trapped by a vapour phase reaction with CarboSorb E forming carbamate  
144 which was mixed with PermaFluor E + a scintillation cocktail ready for counting the  
145 radioactivity present on the Liquid Scintillation Counter (LSC). Regular checks were  
146 performed throughout the analysis to ensure the recovery of the samples remained above 95  
147 %.

148 *E. fetida* were extracted by liquid extraction using the same solvents as for the soil  
149 extractions. Prior to extraction, *E. fetida* were defrosted, solvent (5 mL) was then added to the  
150 defrosted samples and the worm/solvent mix was homogenised for 5 min using a LabGen  
151 Series 7 homogeniser. The suspension was transferred from the beaker to a glass test tube and  
152 the beaker was then rinsed with an additional 3 mL of solvent which was combined with the  
153 suspension to give a total extract volume of 8 mL. The extracts were centrifuged at 415 g for  
154 30 min (CHRIST Rotational Vacuum-Concentrator RVC 2-33 CD) and a 1 mL sample of the  
155 resulting supernatant was then added to 10 mL of EcoScint A.

156

157 **Potential metabolism in earthworms**

158 ***Methods:***

159 To ascertain whether the radioactivity we were measuring in our earthworm samples was that  
160 of the parent compound or metabolite/transformation products, additional studies were  
161 performed using unlabelled compounds. Studies were performed at 20 times the soil  
162 concentration used in the radiolabelling studies to ensure that compounds were detectable in  
163 the worm matrix.

164 *E. fetida* were exposed to unlabelled carbamazepine, diclofenac and fluoxetine for 21 days  
165 (six replicates per compound) under similar conditions to the original studies, after which  
166 they were allowed to purge their guts for 24 h and subsequently frozen (-20 °C) ready for  
167 analysis. *E. fetida* were then injected with a known amount of stable isotope-labelled  
168 standard (carbamazepine d-10, diclofenac d-4 and fluoxetine d-5) and extracted using  
169 methods outlined above. The supernatant from these extractions was taken to dryness under a  
170 N<sub>2</sub> stream and reconstituted in 200 µL of methanol:water (50:50 v:v). This was further  
171 centrifuged at 12000 RPM to sediment loose particles and the resulting extracts were  
172 transferred to HPLC vials for analysis. Calibration (six concentrations, three replicates) and  
173 quality control samples (three concentrations, six replicates at intermediary concentrations  
174 across the calibration range) were also prepared in worm matrix for each of the respective  
175 compounds. The calibration range was 0 - 1500 ng/mL; 0 - 800 ng/mL and 0 - 1375 ng/mL  
176 for carbamazepine, diclofenac and fluoxetine respectively.

177

178

179

180 *Analytical methods:*

181 *LC-MS/MS analysis*

182 Extracts were analysed for the pharmaceuticals by LC-MS/MS using a Dionex Ultimate 3000  
183 and Applied Biosystems API 3000. HPLC separation was performed with a Symmetry C18  
184 3.5  $\mu\text{m}$ , 4.6 x 75 mm column and Symmetry C18 3.5 mm, 2.1 x 10 mm guard column  
185 (Waters) with a mobile phase flow rate of 1 mL/min. The mobile phase composition was  
186 aqueous 1 % formic acid (v:v) (mobile phase A) and 1 % formic acid (v:v) in acetonitrile  
187 (mobile phase B) using a gradient program over 5 min for carbamazepine and fluoxetine and  
188 7.5 min for diclofenac. For carbamazepine and fluoxetine the gradient was 0.0-2.5 min 43 %  
189 B, 2.5-2.6 min 43-95 % B, 2.6-3.6 min 95 % B, 3.6-3.7 min 95-43 % B, 3.7-5.0 min 43 % B.  
190 For diclofenac the relative flow of mobile phase B was 0.0-1.5 min 43 % B, 1.5-4.0 min 43-  
191 80 % B, 4.0-4.2 min 80-95 % B, 4.2-5.5 min 95 % B, 5.5-5.7 min 95-43 % B, 5.7-7.5 min 43-  
192 % B. MS/MS analysis was undertaken using electrospray ionisation (ESI) in positive  
193 ionisation mode, using the turbo ion-spray interface. Spray voltage was 5000 V, with the ESI  
194 capillary line maintained at 550°C and collision gas ( $\text{N}_2$ ) pressure set at 6. Fragmentation  
195 parameters are detailed in Table SI 2.

196 Qualitative and quantitative analysis of compounds was based on multiple reaction  
197 monitoring (MRM); measuring the relative peak areas of the product ion from analyte and  
198 internal standard.

199 For the calibration range of 0 - 1500 ng/mL, 0 - 800 ng/mL and 0 - 1375 ng/mL the  $R^2$  of  
200 calibration fits are 0.92, 0.98, 0.99 for carbamazepine, diclofenac, fluoxetine respectively.  
201 The mean accuracy for the QC's ranged between 88.6 – 108.5%, 95.8 – 97.6% and 82.1 –  
202 96.3% and the mean standard deviation for QC's ranged between 5.3 – 9.1, 5.6 – 9.7 and 3.3

203 – 8.2 for carbamazepine, diclofenac and fluoxetine respectively. Lower limits of  
204 quantification (LLOQs) were 375 ng/mL, 12.5 ng/mL and 150 ng/mL for carbamazepine,  
205 diclofenac and fluoxetine respectively.

#### 206 ***LC-FTMS***

207 HPLC separation was performed with a Jupiter 4u Proteo 90A, 1.0 x 150 mm column with a  
208 mobile phase flow rate of 0.1 mL/min. The mobile phase composition was aqueous 1 %  
209 formic acid (v:v) (mobile phase A) and 1 % formic acid (v:v) in acetonitrile (mobile phase B)  
210 using a gradient program 0.0-20.0 min 10-90% B, 20.0-21.0 min 90% B, 21.0-21.5 min 90-  
211 10% B, 21.5-26.5 min 10% B. MS analysis was undertaken using positive mode electrospray  
212 ionisation (ESI). Spray voltage: 4500 V, 6 L/min dry gas (N<sub>2</sub>) at 250 °C and 3 bar nebuliser  
213 gas. Acquisition range *m/z* 100-2000, with transient time 0.367 s giving an estimated  
214 resolution of 66000 at *m/z* 400.

215

#### 216 ***Results – Determination of parent compound in earthworm tissue samples:***

217 Based on previous results, a biota-soil accumulation factor (BSAF) was calculated. Using  
218 spiked soil concentrations, expected concentration of the pharmaceuticals in the worm tissue  
219 was estimated (see Table SI 3).

220 Both carbamazepine and fluoxetine were detected in the worm tissue at concentrations  
221 slightly greater than expected. Diclofenac was not detected. Diclofenac worm extracts were  
222 subsequently analysed using LC-FTMS to look for known diclofenac metabolites and  
223 transformation products using a Dionex Ultimate 3000 HPLC and solariX 9.4 T (Bruker) FT-  
224 ICR mass spectrometer (known metabolites are provided in Table SI 5).

225

226 **References**

- 227 Dong, L.; Gao, J.; Xie, X.; Zhou, Q. DNA damage and biochemical toxicity of antibiotics in  
228 soil on the earthworm *Eisenia fetida*. *Chemosphere* **2012**, *89*, 44–51.
- 229 European Chemicals Bureau. *Technical Guidance Document on Risk Assessment Part II Chapter 3*  
230 *Environmental Risk Assessment*. (European Commission Joint Research Centre, 2003). at  
231 <[http://ihcp.jrc.ec.europa.eu/our\\_activities/public-](http://ihcp.jrc.ec.europa.eu/our_activities/public-health/risk_assessment_of_Biocides/doc/tgd/tgdpart2_2ed.pdf)  
232 [health/risk\\_assessment\\_of\\_Biocides/doc/tgd/tgdpart2\\_2ed.pdf](http://ihcp.jrc.ec.europa.eu/our_activities/public-health/risk_assessment_of_Biocides/doc/tgd/tgdpart2_2ed.pdf)>
- 233 Huber, C.; Bartha, B.; Schröder, P. Metabolism of diclofenac in plants – Hydroxylation is  
234 followed by glucose conjugation. *J. Hazard. Mater.* **2012**, *243*, 250–256.
- 235 Kallio, J.M.; Lahti, M.; Oikari, A.; Kronberg, L. Metabolites of the aquatic pollutant  
236 diclofenac in fish bile. *Environ. Sci. Technol.* **2010**, *44*, 7213–7219.
- 237 Lee, H.J.; Lee, E.; Yoon, S.H.; Chang, H.R.; Kim, K.; Kwon, J.H. Enzymatic and microbial  
238 transformation assays for the evaluation of the environmental fate of diclofenac and  
239 its metabolites. *Chemosphere* **2012**, *87*, 969–974.
- 240 Qu, M.; Xu, Y.; Chen, H.; Li, Z.; Sun, L.; Xu, D.; Kong, Z.; Sugiura, N. Toxicological study  
241 of three veterinary drugs on *Eisenia foetida*. *Ying Yong Sheng Tai Xue Bao J. Appl.*  
242 *Ecol.* **2005**, *16*, 1108–11.
- 243 Scheurell, M.; Franke, S.; Shah, R.M.; Huehnerfuss, H. Occurrence of diclofenac and its  
244 metabolites in surface water and effluent samples from Karachi, Pakistan.  
245 *Chemosphere* **2009**, *77*, 870–876.
- 246 Stülten, D.; Zühlke, S.; Lamshöft, M.; Spiteller, M. Occurrence of diclofenac and selected  
247 metabolites in sewage effluents. *Sci. Total Environ.* **2008**, *405*, 310–316.
- 248 European Chemicals Bureau. *Technical Guidance Document on Risk Assessment Part II Chapter 3*



249 *Environmental Risk Assessment*. (European Commission Joint Research Centre, 2003). at  
250 <[http://ihcp.jrc.ec.europa.eu/our\\_activities/public-](http://ihcp.jrc.ec.europa.eu/our_activities/public-health/risk_assessment_of_Biocides/doc/tgd/tgdpart2_2ed.pdf)  
251 [health/risk\\_assessment\\_of\\_Biocides/doc/tgd/tgdpart2\\_2ed.pdf](http://ihcp.jrc.ec.europa.eu/our_activities/public-health/risk_assessment_of_Biocides/doc/tgd/tgdpart2_2ed.pdf)>
